# Supplementary material for: The generic skills learning systematic: Evaluating university students’ learning after complex problem-solving
Source: Frontiers journal article supplement (doi:10.3389/feduc.2022.1007361), 2022-11-03
Supplement: Table_1.DOCX [file Table_1.DOCX]

**Supplementary material - Table**

**Table A.** Prevalence (frequencies and percentages) of the learning categories combined with generic skills found in 43 learner reports.

|  |  | Learning categories | | | | | | | | | |  | |
| --- | --- | --- | --- | --- | --- | --- | --- | --- | --- | --- | --- | --- | --- |
| Generic Skills | Total reports | Value | | Under standing | | Self-level | | Intention | | Progress | | Category unknown | |
| Management of others: |  | # | % | # | % | # | % | # | % | # | % | # | % |
| Collaborating | 36 (84) | 1 | 3 | 14 | 39 | 21 | 58 | 7 | 19 | 9 | 25 | 6 | 17 |
| Giving feedback | 17 (40) | 5 | 30 | 3 | 18 | 11 | 65 | 6 | 35 | 3 | 18 | 2 | 12 |
| Respecting | 11 (26) | 1 | 9 | 1 | 9 | 3 | 27 | 2 | 18 | 7 | 64 | 1 | 9 |
| Leadership | 10 (23) |  |  |  |  | 8 | 80 | 1 | 10 | 2 | 20 | 1 | 10 |
| Adapting | 7 (16) |  |  |  |  | 6 | 86 | 2 | 29 |  |  |  |  |
| Justifying | 6 (14) | 1 | 17 |  |  | 5 | 83 | 1 | 17 | 1 | 17 |  |  |
| Negotiating | 5 (12) |  |  | 1 | 20 | 3 | 60 | 1 | 20 | 2 | 40 |  |  |
| Agreeing | 1 (2) |  |  |  |  | 1 | 100 |  |  |  |  |  |  |
| Supporting | 1 (2) |  |  |  |  | 1 | 100 |  |  |  |  |  |  |
| At least one ‘other’ | 39 (91) |  |  |  |  |  |  |  |  |  |  |  |  |
|  |  |  |  |  |  |  |  |  |  |  |  |  |  |
| Management of self: |  |  |  |  |  |  |  |  |  |  |  |  |  |
| Coping with stress | 12 (28) |  |  | 3 | 25 | 7 | 58 | 1 | 8 | 9 | 75 |  |  |
| Learning | 7 (16) |  |  |  |  | 7 | 100 |  |  |  |  |  |  |
| Flexibility | 6 (14) |  |  | 1 | 17 | 6 | 100 | 1 | 17 | 1 | 17 |  |  |
| Time-management | 6 (14) | 1 | 17 |  |  | 4 | 67 | 1 | 17 | 1 | 17 |  |  |
| Reflecting | 5 (12) |  |  |  |  | 2 | 40 | 4 | 80 |  |  |  |  |
| Handling feedback | 4 (9) |  |  |  |  | 3 | 75 |  |  | 1 | 25 |  |  |
| Responsibility | 3 (7) |  |  |  |  | 1 | 33 | 2 | 67 |  |  |  |  |
| Goal-setting | 3 (7) |  |  |  |  | 3 | 100 | 1 | 33 | 1 | 33 |  |  |
| Transferability | 2 (5) | 1 | 50 |  |  | 2 | 100 |  |  |  |  |  |  |
| Planning | 1 (2) |  |  |  |  | 1 | 100 |  |  |  |  |  |  |
| Listening | 1 (2) |  |  |  |  | 1 | 100 |  |  |  |  |  |  |
| Analyzing |  |  |  |  |  |  |  |  |  |  |  |  |  |
| At least one ‘self’ | 29 (67) |  |  |  |  |  |  |  |  |  |  |  |  |
|  |  |  |  |  |  |  |  |  |  |  |  |  |  |
| Management of information: |  |  |  |  |  |  |  |  |  |  |  |  |  |
| Communicating | 17 (40) | 2 | 12 | 7 | 41 | 10 | 59 | 3 | 18 | 3 | 18 | 3 | 18 |
| Selecting | 6 (14) |  |  | 2 | 33 | 2 | 33 |  |  | 2 | 33 | 2 | 33 |
| Creativity | 5 (12) |  |  |  |  | 1 | 20 | 3 | 60 | 3 | 60 |  |  |
| Language | 5 (12) |  |  |  |  | 2 | 40 |  |  | 2 | 40 | 1 | 20 |
| Technology | 2 (5) | 1 | 50 | 1 | 50 |  |  |  |  |  |  |  |  |
| Data handling | 1 (2) |  |  |  |  | 1 | 100 |  |  |  |  |  |  |
| Interpreting | 1 (2) | 1 | 100 |  |  |  |  |  |  |  |  |  |  |
| Critical | 1 (2) |  |  |  |  | 1 | 100 |  |  |  |  |  |  |
| Media |  |  |  |  |  |  |  |  |  |  |  |  |  |
| At least one ‘information’ | 25 (58) |  |  |  |  |  |  |  |  |  |  |  |  |
|  |  |  |  |  |  |  |  |  |  |  |  |  |  |
| Management of tasks |  |  |  |  |  |  |  |  |  |  |  |  |  |
| Executing | 7 (16) |  |  | 2 | 29 | 2 | 29 | 1 | 14 | 2 | 29 | 2 | 29 |
| Prioritizing | 5 (12) | 3 | 60 |  |  |  |  | 1 | 20 | 2 | 40 |  |  |
| Options | 3 (7) |  |  | 1 | 33 | 1 | 33 |  |  | 1 | 33 |  |  |
| Assessing | 2 (5) |  |  | 1 | 50 | 1 | 50 |  |  |  |  |  |  |
| Conceptualizing | 1 (2) |  |  |  |  |  |  |  |  | 1 | 100 |  |  |
| Key features | 0 |  |  |  |  |  |  |  |  |  |  |  |  |
| At least one ‘tasks’ | 15 (35) |  |  |  |  |  |  |  |  |  |  |  |  |
|  |  |  |  |  |  |  |  |  |  |  |  |  |  |
| General | 39 (91) | 3 | 8 | 13 | 33 | 26 | 67 | 7 | 18 | 7 | 18 | 30 | 77 |
